# Supplementary material for: Whole Genome Sequence of a Turkish Individual
Source: PubMed Central journal article supplement (PMC3887021; doi:10.1371/journal.pone.0085233), 2014-01-09
Supplement: pone.0085233.s010.pdf [file pone.0085233.s010.pdf]

**Table S2:** 20 predicted indels used for validation by Sanger Sequencing (**V:** Validated **NV:** Not Validated)

| Variant                 | Gene Name | Accession    | Chr | Start     | End       | Reference               | Observation           | Heterozygosity Status | Sanger Seq. |
|-------------------------|-----------|--------------|-----|-----------|-----------|-------------------------|-----------------------|-----------------------|-------------|
| Frameshift Deletion     | ZNF717    | NM_001128223 | 3   | 75790773  | 75790783  | GGCTGCTGTAG             | -                     | Het                   | V           |
| Frameshift Deletion     | OR4L1     | NM_001004717 | 14  | 20528449  | 20528467  | CATAGATTTGCTCACTG<br>AC | -                     | Het                   | V           |
| Frameshift Deletion     | DCHS2     | NM_001142552 | 4   | 155244402 | 155244405 | TTTG                    | -                     | Hom                   | V           |
| Frameshift Insertion    | SETBP1    | NM_001130110 | 18  | 42456670  | 42456670  | -                       | TCTT                  | Hom                   | V           |
| Frameshift Insertion    | ZNF717    | NM_001128223 | 3   | 75786555  | 75786555  | -                       | TG                    | Het                   | V           |
| Frameshift Insertion    | C11orf40  | NM_144663    | 11  | 4592708   | 4592708   | -                       | AG                    | Hom                   | NV          |
| Frameshift Insertion    | ATRN1     | NM_001276282 | 10  | 116931101 | 116931101 | -                       | TT                    | Hom                   | V           |
| Frameshift Insertion    | C11orf40  | NM_144663    | 11  | 4592706   | 4592706   | -                       | AC                    | Hom                   | V           |
| Nonframeshift Deletion  | ZNF717    | NM_001128223 | 3   | 75786315  | 75786323  | CTACATTCT               | -                     | Het                   | V           |
| Nonframeshift Deletion  | PRUNE2    | NM_015225    | 9   | 79318376  | 79318390  | GTGACAGCCTGCAAC         | -                     | Hom                   | V           |
| Nonframeshift Deletion  | KLRF1     | NM_016523    | 12  | 9994446   | 9994448   | TGT                     | -                     | Hom                   | V           |
| Nonframeshift Insertion | MUC4      | NM_018406    | 3   | 195518112 | 195518112 | -                       | GTCTCCTGCGTAACA       | Hom                   | V           |
| Nonframeshift Insertion | C8orf59   | NM_001099671 | 8   | 86126827  | 86126827  | -                       | AACATT                | Hom                   | V           |
| Nonframeshift Insertion | SYNJ1     | NM_001160306 | 21  | 34003928  | 34003928  | -                       | AGTATT                | Hom                   | V           |
| Nonframeshift Insertion | USP40     | NM_018218    | 2   | 234429739 | 234429739 | -                       | TTC                   | Hom                   | NV          |
| Nonframeshift Insertion | OR5P2     | NM_153444    | 11  | 7818383   | 7818383   | -                       | ATATGGTTACCAGGTAGATGC | Het                   | V           |
| Nonframeshift Insertion | ZNF714    | NM_182515    | 19  | 21299774  | 21299774  | -                       | ATA                   | Hom                   | V           |
| Nonframeshift Insertion | C18orf25  | NM_001008239 | 18  | 43833701  | 43833701  | -                       | CTG                   | Hom                   | V           |
| Nonframeshift Insertion | CCDC180   | NM_020893    | 9   | 100092968 | 100092968 | -                       | GAGGAG                | Hom                   | V           |
| Stopgain SNV            | RETNLB    | NM_032579    | 3   | 108475993 | 108475993 | -                       | GGGGATTA              | Het                   | V           |
