# Supplementary material for: Whole Genome Sequence of a Turkish Individual
Source: PubMed Central journal article supplement (PMC3887021; doi:10.1371/journal.pone.0085233), 2014-01-09
Supplement: pone.0085233.s012.pdf [file pone.0085233.s012.pdf]

**Table S4:** Biological Function categories known to involve 45 well characterized genes that were affected by a high-impact SNP.

| Category                                                       | Functions Annotation                                          | Molecules                                                        |
|----------------------------------------------------------------|---------------------------------------------------------------|------------------------------------------------------------------|
| <b>Amino Acid Metabolism</b>                                   | secretion of GABA                                             | HTR2C                                                            |
| <b>Auditory and Vestibular System Development and Function</b> | sensitivity of basilar membrane                               | TECTA                                                            |
|                                                                | abnormal morphology of otolithic membrane                     | TECTA                                                            |
|                                                                | quantity of otoliths                                          | TECTA                                                            |
|                                                                | abnormal morphology of enlarged otoliths                      | TECTA                                                            |
|                                                                | abnormal morphology of tectorial membrane                     | TECTA                                                            |
| <b>Auditory Disease</b>                                        | childhood onset deafness DFNB8                                | TECTA                                                            |
| <b>Behavior</b>                                                | Stereotypy                                                    | HTR2C                                                            |
| <b>Cancer</b>                                                  | survival of pancreatic cancer cells                           | XIAP                                                             |
|                                                                | survival of carcinoma cells                                   | XIAP                                                             |
|                                                                | growth of lung tumor                                          | XIAP                                                             |
|                                                                | malignant cutaneous melanoma cancer                           | CDC27,MLL3, TECTA                                                |
|                                                                | childhood acute lymphoblastic leukemia                        | XIAP                                                             |
|                                                                | tumorigenesis of fibroblast cell lines                        | CAST                                                             |
|                                                                | Cancer                                                        | CAD,CDC27, CES1,CLTCL 1,DST,MLL3,PP2R2B,SAFB2,TECTA,TF AP2B,XIAP |
|                                                                | alveolar rhabdomyosarcoma                                     | TFAP2B                                                           |
| <b>Carbohydrate Metabolism</b>                                 | hydrolysis of inositol phosphate                              | HTR2C                                                            |
|                                                                | regulation of D-glucose                                       | HTR2C                                                            |
| <b>Cardiovascular Disease</b>                                  | congestive heart failure                                      | TFAP2B,XIAP                                                      |
|                                                                | vascular dementia                                             | HTR2C                                                            |
|                                                                | Hemopericardium                                               | XIAP                                                             |
| <b>Cell Cycle</b>                                              | mitotic exit of cervical cancer cell lines                    | MYT1                                                             |
|                                                                | re-entry into cell cycle progression of fibroblast cell lines | CAST                                                             |
|                                                                | metaphase/anaphase transition                                 | CDC27                                                            |
|                                                                | mitochondrial fission                                         | PPP2R2B                                                          |

|                                |                                                   |                                |
|--------------------------------|---------------------------------------------------|--------------------------------|
|                                | cell cycle progression                            | CAST,CDC27,CLTCL1,MYT1,PPP2R2B |
|                                | cell cycle progression of colon cancer cell lines | CDC27                          |
| <b>Cell Death and Survival</b> | anoikis of prostate cancer cells                  | XIAP                           |
|                                | survival of pancreatic cancer cells               | XIAP                           |
|                                | apoptosis of insect cell lines                    | XIAP                           |
|                                | survival of carcinoma cells                       | XIAP                           |
|                                | degeneration of retinal ganglion cells            | XIAP                           |
|                                | apoptosis of ovarian surface epithelial cells     | XIAP                           |
|                                | apoptosis of pancreatic cancer cells              | XIAP                           |
|                                | loss of neurons                                   | CAST,XIAP                      |
|                                | apoptosis of brain cells                          | CAST,XIAP                      |
|                                | apoptosis of endometrial cancer cell lines        | XIAP                           |
|                                | apoptosis of renal tubule                         | TFAP2B                         |
|                                | apoptosis of neurons                              | CAST,PPP2R2B,XIAP              |
|                                | apoptosis of carcinoma cell lines                 | TFAP2B,XIAP                    |
|                                | apoptosis of lung cancer cell lines               | TFAP2B,XIAP                    |
|                                | cell death of neuroblastoma cell lines            | CAST,DST                       |
|                                | anoikis of intestinal cell lines                  | XIAP                           |
|                                | apoptosis of leukocytes                           | CAST,PPP2R2B,XIAP              |
|                                | apoptosis of T-cell hybrid cells                  | XIAP                           |
|                                | apoptosis of granulosa cells                      | XIAP                           |
| <b>Cell Morphology</b>         | coalignment of microfilaments                     | DST                            |
|                                | coalignment of neurofilaments                     | DST                            |
|                                | polarization of Schwann cells                     | DST                            |
|                                | binucleation of fibroblasts                       | PCNT                           |
|                                | morphology of filopodia                           | CAST                           |
|                                | polarization of neutrophils                       | CAST                           |
|                                | polarization of cells                             | CAST,DST                       |
|                                | cell spreading of blood platelets                 | CAST                           |
|                                | extension of lamellipodia                         | CAST                           |
|                                | morphology of cellular protrusions                | CAST,DST                       |
|                                | abnormal morphology of myelin sheath              | DST                            |
|                                | formation of autophagosomes                       | CAST                           |

|                                               |                                                                   |            |
|-----------------------------------------------|-------------------------------------------------------------------|------------|
| <b>Cell-To-Cell Signaling and Interaction</b> | dissociation of focal adhesions                                   | CAST       |
|                                               | activation of ova                                                 | CAST       |
|                                               | modulation of dopamine                                            | HTR2C      |
|                                               | activation of dopaminergic neurons                                | HTR2C      |
|                                               | cochlear microphonics                                             | TECTA      |
|                                               | concentration of dopamine                                         | HTR2C,XIAP |
|                                               | compound action potential of cochlear nerve                       | TECTA      |
|                                               | secretion of acetylcholine                                        | HTR2C      |
|                                               | synaptic transmission of superior cervical ganglion neurons       | CAST       |
| <b>Cellular Assembly and Organization</b>     | formation of phagosomes                                           | CAST,CDC27 |
|                                               | coalignment of microfilaments                                     | DST        |
|                                               | coalignment of neurofilaments                                     | DST        |
|                                               | dissociation of focal adhesions                                   | CAST       |
|                                               | formation of annulate lamellae                                    | NUP153     |
|                                               | transport of axons                                                | DST        |
|                                               | secretion of alpha granules                                       | CAST       |
|                                               | organization of cytoplasmic microtubule                           | DST        |
|                                               | extension of lamellipodia                                         | CAST       |
|                                               | shortening of telomeres                                           | TFAP2B     |
|                                               | nucleation of microtubules                                        | PCNT       |
|                                               | organization of mitotic spindle                                   | PCNT       |
|                                               | disruption of cytoskeleton                                        | CAST       |
|                                               | formation of autophagosomes                                       | CAST       |
| <b>Cellular Compromise</b>                    | binucleation of fibroblasts                                       | PCNT       |
|                                               | neurodegeneration of CA1 neuron                                   | XIAP       |
|                                               | breakdown of nuclear envelope                                     | NUP153     |
|                                               | endoplasmic reticulum stress response of neuroblastoma cell lines | DST        |
|                                               | degeneration of retinal ganglion cells                            | XIAP       |
|                                               | disorganization of cytoskeleton                                   | DST        |
|                                               | fragmentation of mitochondria                                     | PPP2R2B    |
|                                               | fragmentation of Golgi apparatus                                  | DST        |
|                                               | disruption of cytoskeleton                                        | CAST       |
| <b>Cellular Development</b>                   | osteoclastogenesis of macrophage cancer cell lines                | CAST       |

|                                                   |                                                                               |                   |
|---------------------------------------------------|-------------------------------------------------------------------------------|-------------------|
|                                                   | osteoclastogenesis of bone-marrow-derived monocyte/macrophage precursor cells | CAST              |
|                                                   | differentiation of adipoblasts                                                | CAST              |
| <b>Cellular Function and Maintenance</b>          | formation of phagosomes                                                       | CAST,CDC27        |
|                                                   | function of gamma cells                                                       | MYT1              |
|                                                   | endoplasmic reticulum stress response of neuroblastoma cell lines             | DST               |
|                                                   | secretion of alpha granules                                                   | CAST              |
|                                                   | function of outer hair cells                                                  | TECTA             |
|                                                   | organization of cytoplasmic microtubule                                       | DST               |
|                                                   | extension of lamellipodia                                                     | CAST              |
|                                                   | nucleation of microtubules                                                    | PCNT              |
|                                                   | organization of mitotic spindle                                               | PCNT              |
|                                                   | axonal transport                                                              | DST               |
|                                                   | formation of autophagosomes                                                   | CAST              |
| <b>Cellular Movement</b>                          | transport of axons                                                            | DST               |
|                                                   | chemokinesis of neutrophils                                                   | CAST              |
|                                                   | migration of bladder cancer cell lines                                        | XIAP              |
| <b>Cellular Response to Therapeutics</b>          | sensitivity of tumor cell lines                                               | XIAP              |
| <b>Connective Tissue Development and Function</b> | re-entry into cell cycle progression of fibroblast cell lines                 | CAST              |
|                                                   | osteoclastogenesis of bone-marrow-derived monocyte/macrophage precursor cells | CAST              |
|                                                   | differentiation of adipoblasts                                                | CAST              |
| <b>Connective Tissue Disorders</b>                | microcephalic osteodysplastic primordial dwarfism, type 2                     | PCNT              |
|                                                   | tumorigenesis of fibroblast cell lines                                        | CAST              |
| <b>Dermatological Diseases and Conditions</b>     | infection of epithelial cell lines                                            | CAD,NUP153, XIAP  |
|                                                   | malignant cutaneous melanoma cancer                                           | CDC27,MLL3, TECTA |
|                                                   | blister                                                                       | DST               |
| <b>Developmental Disorder</b>                     | Char syndrome                                                                 | TFAP2B            |
|                                                   | microcephalic osteodysplastic primordial dwarfism, type 2                     | PCNT              |
|                                                   | Seckel syndrome 4                                                             | PCNT              |
|                                                   | postaxial polydactyly                                                         | TFAP2B            |

|                                                          |                                                                               |                      |
|----------------------------------------------------------|-------------------------------------------------------------------------------|----------------------|
|                                                          | dystrophy of neurites                                                         | CAST                 |
|                                                          | congenital anomaly of musculoskeletal system                                  | CAST,PCNT,T<br>FAP2B |
| <b>DNA Replication,<br/>Recombination, and Repair</b>    | organization of mitotic spindle                                               | PCNT                 |
| <b>Drug Metabolism</b>                                   | hydrolysis of D-methylphenidate                                               | CES1                 |
|                                                          | hydrolysis of cocaine                                                         | CES1                 |
|                                                          | hydrolysis of irinotecan                                                      | CES1                 |
|                                                          | modulation of dopamine                                                        | HTR2C                |
|                                                          | concentration of dopamine                                                     | HTR2C,XIAP           |
| <b>Embryonic Development</b>                             | ventralization of embryo                                                      | XIAP                 |
|                                                          | development of collecting tubule                                              | TFAP2B               |
|                                                          | osteoclastogenesis of bone-marrow-derived monocyte/macrophage precursor cells | CAST                 |
| <b>Endocrine System<br/>Development and Function</b>     | release of corticosterone                                                     | HTR2C                |
|                                                          | quantity of PTH in blood                                                      | TFAP2B               |
| <b>Endocrine System Disorders</b>                        | hypocalciuria                                                                 | TFAP2B               |
|                                                          | hyperprolactinemia                                                            | HTR2C                |
|                                                          | hypocalcemia                                                                  | TFAP2B               |
| <b>Gastrointestinal Disease</b>                          | primary sclerosing cholangitis                                                | XIAP                 |
| <b>Hematological Disease</b>                             | hyperphosphatemia                                                             | TFAP2B               |
|                                                          | childhood acute lymphoblastic leukemia                                        | XIAP                 |
|                                                          | hypocalcemia                                                                  | TFAP2B               |
| <b>Hematological System<br/>Development and Function</b> | chemokinesis of neutrophils                                                   | CAST                 |
|                                                          | polarization of neutrophils                                                   | CAST                 |
|                                                          | osteoclastogenesis of bone-marrow-derived monocyte/macrophage precursor cells | CAST                 |
|                                                          | quantity of foam cells                                                        | CES1                 |
|                                                          | cell spreading of blood platelets                                             | CAST                 |
| <b>Hematopoiesis</b>                                     | osteoclastogenesis of bone-marrow-derived monocyte/macrophage precursor cells | CAST                 |
| <b>Hepatic System Disease</b>                            | primary sclerosing cholangitis                                                | XIAP                 |
| <b>Hereditary Disorder</b>                               | Char syndrome                                                                 | TFAP2B               |
|                                                          | X-linked familial hemophagocytic lymphohistiocytosis                          | XIAP                 |
|                                                          | dystonia mysculorum deformans 2                                               | DST                  |

|                                |                                                           |                                         |
|--------------------------------|-----------------------------------------------------------|-----------------------------------------|
|                                | microcephalic osteodysplastic primordial dwarfism, type 2 | PCNT                                    |
|                                | spinocerebellar ataxia 12                                 | PPP2R2B                                 |
|                                | spinocerebellar ataxia recessive 9                        | ADCK3                                   |
|                                | Seckel syndrome 4                                         | PCNT                                    |
|                                | X-linked lymphoproliferative syndrome                     | XIAP                                    |
|                                | childhood onset deafness DFNB8                            | TECTA                                   |
|                                | spinocerebellar ataxia                                    | ADCK3,PPP2R2B                           |
|                                | Schizophrenia                                             | CAD,HTR2C,MLL3,NBPF15 (includes others) |
|                                | hebephrenic schizophrenia                                 | HTR2C                                   |
|                                | paranoid schizophrenia                                    | HTR2C                                   |
|                                | X-linked hereditary disease                               | CAST,XIAP                               |
| <b>Immune Cell Trafficking</b> | chemokinesis of neutrophils                               | CAST                                    |
| <b>Immunological Disease</b>   | X-linked familial hemophagocytic lymphohistiocytosis      | XIAP                                    |
| <b>Immunological Disease</b>   | X-linked lymphoproliferative syndrome                     | XIAP                                    |
|                                | seasonal allergic rhinitis                                | HTR2C                                   |
|                                | allergic rhinoconjunctivitis                              | HTR2C                                   |
|                                | childhood acute lymphoblastic leukemia                    | XIAP                                    |
| <b>Infectious Disease</b>      | infection of embryonic cell lines                         | CAD,NUP153,XIAP                         |
|                                | infection of epithelial cell lines                        | CAD,NUP153,XIAP                         |
|                                | infection of kidney cell lines                            | CAD,NUP153,XIAP                         |
|                                | infection of cells                                        | CAD,CLTCL1,NUP153,XIAP                  |
| <b>Inflammatory Disease</b>    | seasonal allergic rhinitis                                | HTR2C                                   |
|                                | allergic rhinoconjunctivitis                              | HTR2C                                   |
|                                | primary sclerosing cholangitis                            | XIAP                                    |
| <b>Inflammatory Response</b>   | chemokinesis of neutrophils                               | CAST                                    |
|                                | polarization of neutrophils                               | CAST                                    |
|                                | quantity of foam cells                                    | CES1                                    |
|                                | cell spreading of blood platelets                         | CAST                                    |
| <b>Lipid Metabolism</b>        | elimination of cholesterol                                | CES1                                    |
|                                | synthesis of D-erythro-C16-ceramide                       | XIAP                                    |
|                                | release of corticosterone                                 | HTR2C                                   |
|                                | secretion of GABA                                         | HTR2C                                   |

|                                                  |                                                                               |               |
|--------------------------------------------------|-------------------------------------------------------------------------------|---------------|
|                                                  | concentration of bile acid                                                    | MLL3          |
| <b>Lymphoid Tissue Structure and Development</b> | osteoclastogenesis of bone-marrow-derived monocyte/macrophage precursor cells | CAST          |
| <b>Metabolic Disease</b>                         | spinocerebellar ataxia recessive 9                                            | ADCK3         |
|                                                  | beta amyloidosis                                                              | CAST          |
| <b>Molecular Transport</b>                       | elimination of cholesterol                                                    | CES1          |
|                                                  | concentration of dopamine                                                     | HTR2C,XIAP    |
|                                                  | secretion of acetylcholine                                                    | HTR2C         |
|                                                  | release of corticosterone                                                     | HTR2C         |
|                                                  | secretion of GABA                                                             | HTR2C         |
|                                                  | quantity of PTH in blood                                                      | TFAP2B        |
|                                                  | concentration of bile acid                                                    | MLL3          |
| <b>Nervous System Development and Function</b>   | coalignment of neurofilaments                                                 | DST           |
|                                                  | activation of dopaminergic neurons                                            | HTR2C         |
|                                                  | cochlear microphonics                                                         | TECTA         |
|                                                  | transport of axons                                                            | DST           |
|                                                  | mechanotransduction of hair cells                                             | TECTA         |
|                                                  | compound action potential of cochlear nerve                                   | TECTA         |
|                                                  | function of outer hair cells                                                  | TECTA         |
|                                                  | synaptic transmission of superior cervical ganglion neurons                   | CAST          |
|                                                  | loss of neurons                                                               | CAST,XIAP     |
|                                                  | abnormal morphology of myelin sheath                                          | DST           |
|                                                  | axonal transport                                                              | DST           |
| <b>Neurological Disease</b>                      | dysmyelination of peripheral nervous system                                   | DST           |
|                                                  | dystonia musculorum deformans 2                                               | DST           |
|                                                  | microcephalic osteodysplastic primordial dwarfism, type 2                     | PCNT          |
|                                                  | spinocerebellar ataxia 12                                                     | PPP2R2B       |
|                                                  | spinocerebellar ataxia recessive 9                                            | ADCK3         |
|                                                  | childhood onset deafness DFNB8                                                | TECTA         |
|                                                  | neurodegeneration of CA1 neuron                                               | XIAP          |
|                                                  | spinocerebellar ataxia                                                        | ADCK3,PPP2R2B |
|                                                  | onset of amyotrophic lateral sclerosis                                        | XIAP          |
|                                                  | suicidal behavior                                                             | CAD           |

|                               |                                                                               |                                                   |
|-------------------------------|-------------------------------------------------------------------------------|---------------------------------------------------|
|                               | beta amyloidosis                                                              | CAST                                              |
|                               | microgliosis of brain                                                         | CAST                                              |
|                               | dystrophy of neurites                                                         | CAST                                              |
|                               | Schizophrenia                                                                 | CAD,HTR2C,<br>MLL3,NBPF15<br>(includes<br>others) |
|                               | muscle spasm                                                                  | TFAP2B                                            |
|                               | tic disorder                                                                  | HTR2C                                             |
|                               | amyotrophic lateral sclerosis                                                 | HTR2C,XIAP                                        |
|                               | Asperger syndrome                                                             | HTR2C                                             |
|                               | tonic seizure                                                                 | HTR2C                                             |
|                               | bipolar II disorder                                                           | HTR2C                                             |
|                               | cannabis dependence                                                           | HTR2C                                             |
|                               | hebephrenic schizophrenia                                                     | HTR2C                                             |
|                               | major depression                                                              | CAD,HTR2C                                         |
|                               | paranoid schizophrenia                                                        | HTR2C                                             |
|                               | vascular dementia                                                             | HTR2C                                             |
|                               | anorexia                                                                      | HTR2C                                             |
|                               | psychomotor agitation                                                         | HTR2C                                             |
| <b>Nutritional Disease</b>    | anorexia                                                                      | HTR2C                                             |
|                               | adult-onset obesity                                                           | HTR2C                                             |
| <b>Ophthalmic Disease</b>     | allergic rhinoconjunctivitis                                                  | HTR2C                                             |
| <b>Organ Development</b>      | development of collecting tubule                                              | TFAP2B                                            |
|                               | osteoclastogenesis of bone-marrow-derived monocyte/macrophage precursor cells | CAST                                              |
| <b>Organ Morphology</b>       | sensitivity of basilar membrane                                               | TECTA                                             |
|                               | abnormal morphology of otolithic membrane                                     | TECTA                                             |
|                               | abnormal morphology of enlarged otoliths                                      | TECTA                                             |
|                               | abnormal morphology of dilated proximal convoluted tubule                     | TFAP2B                                            |
|                               | abnormal morphology of tectorial membrane                                     | TECTA                                             |
|                               | opening of eyelid                                                             | MLL3                                              |
| <b>Organismal Development</b> | ventralization of embryo                                                      | XIAP                                              |
|                               | development of collecting tubule                                              | TFAP2B                                            |
|                               | osteoclastogenesis of bone-marrow-derived monocyte/macrophage precursor cells | CAST                                              |



|                                                             |                                                           |                        |
|-------------------------------------------------------------|-----------------------------------------------------------|------------------------|
| <b>Organismal Injury and Abnormalities</b>                  | neurodegeneration of CA1 neuron                           | XIAP                   |
|                                                             | microgliosis of brain                                     | CAST                   |
|                                                             | infection of embryonic cell lines                         | CAD,NUP153, XIAP       |
|                                                             | hot flashes                                               | HTR2C                  |
|                                                             | hemopericardium                                           | XIAP                   |
|                                                             | size of lesion                                            | CES1,XIAP              |
| <b>Post-Translational Modification</b>                      | ubiquitination of protein                                 | CAST,XIAP              |
| <b>Protein Synthesis</b>                                    | quantity of PTH in blood                                  | TFAP2B                 |
| <b>Protein Trafficking</b>                                  | targeting of green fluorescent protein                    | PPP2R2B                |
| <b>Psychological Disorders</b>                              | suicidal behavior                                         | CAD                    |
|                                                             | Schizophrenia                                             | CAD,HTR2C, MLL3,NBPF15 |
|                                                             | Asperger syndrome                                         | HTR2C                  |
|                                                             | bipolar II disorder                                       | HTR2C                  |
|                                                             | cannabis dependence                                       | HTR2C                  |
|                                                             | hebephrenic schizophrenia                                 | HTR2C                  |
|                                                             | major depression                                          | CAD,HTR2C              |
|                                                             | paranoid schizophrenia                                    | HTR2C                  |
|                                                             | vascular dementia                                         | HTR2C                  |
|                                                             | anorexia                                                  | HTR2C                  |
| <b>Renal and Urological Disease</b>                         | infection of kidney cell lines                            | CAD,NUP153, XIAP       |
| <b>Renal and Urological System Development and Function</b> | development of collecting tubule                          | TFAP2B                 |
|                                                             | abnormal morphology of dilated proximal convoluted tubule | TFAP2B                 |
| <b>Reproductive System Development and Function</b>         | activation of ova                                         | CAST                   |
| <b>Reproductive System Disease</b>                          | hyperprolactinemia                                        | HTR2C                  |
| <b>Respiratory Disease</b>                                  | growth of lung tumor                                      | XIAP                   |
|                                                             | seasonal allergic rhinitis                                | HTR2C                  |
|                                                             | allergic rhinoconjunctivitis                              | HTR2C                  |
| <b>Skeletal and Muscular Disorders</b>                      | microcephalic osteodysplastic primordial dwarfism, type 2 | PCNT                   |
|                                                             | postaxial polydactyly                                     | TFAP2B                 |
|                                                             | muscle spasm                                              | TFAP2B                 |
|                                                             | congenital anomaly of musculoskeletal system              | CAST,PCNT,T FAP2B      |
|                                                             | psychomotor agitation                                     | HTR2C                  |

|                                                              |                                                                               |            |
|--------------------------------------------------------------|-------------------------------------------------------------------------------|------------|
|                                                              | alveolar rhabdomyosarcoma                                                     | TFAP2B     |
| <b>Skeletal and Muscular System Development and Function</b> | osteoclastogenesis of macrophage cancer cell lines                            | CAST       |
|                                                              | osteoclastogenesis of bone-marrow-derived monocyte/macrophage precursor cells | CAST       |
| <b>Small Molecule Biochemistry</b>                           | biosynthesis of pyrimidine                                                    | CAD        |
|                                                              | elimination of cholesterol                                                    | CES1       |
|                                                              | hydrolysis of irinotecan                                                      | CES1       |
|                                                              | modulation of dopamine                                                        | HTR2C      |
|                                                              | hydrolysis of inositol phosphate                                              | HTR2C      |
|                                                              | concentration of dopamine                                                     | HTR2C,XIAP |
|                                                              | synthesis of D-erythro-C16-ceramide                                           | XIAP       |
|                                                              | secretion of acetylcholine                                                    | HTR2C      |
|                                                              | regulation of D-glucose                                                       | HTR2C      |
|                                                              | release of corticosterone                                                     | HTR2C      |
|                                                              | secretion of GABA                                                             | HTR2C      |
|                                                              | quantity of PTH in blood                                                      | TFAP2B     |
|                                                              | concentration of bile acid                                                    | MLL3       |
| <b>Tissue Development</b>                                    | dissociation of focal adhesions                                               | CAST       |
|                                                              | development of collecting tubule                                              | TFAP2B     |
|                                                              | osteoclastogenesis of bone-marrow-derived monocyte/macrophage precursor cells | CAST       |
| <b>Tissue Morphology</b>                                     | quantity of foam cells                                                        | CES1       |
|                                                              | size of lesion                                                                | CES1,XIAP  |
|                                                              | abnormal morphology of myelin sheath                                          | DST        |
| <b>Tumor Morphology</b>                                      | anoikis of prostate cancer cells                                              | XIAP       |
|                                                              | survival of pancreatic cancer cells                                           | XIAP       |
|                                                              | survival of carcinoma cells                                                   | XIAP       |
|                                                              | apoptosis of pancreatic cancer cells                                          | XIAP       |
| <b>Visual System Development and Function</b>                | opening of eyelid                                                             | MLL3       |
