# Supplementary material for: Whole Genome Sequence of a Turkish Individual
Source: PLoS One. 2014 Jan 9;9(1):e85233. doi: 10.1371/journal.pone.0085233 (PMC3887021; doi:10.1371/journal.pone.0085233)
Supplement: Table S3 — Forward and reverse primers used in Sanger Sequencing. (PDF) [file pone.0085233.s011.pdf]

**Table S3:** Forward and reverse primers used in Sanger Sequencing

[illegible]

[illegible]

|                                 |                |                        |       |    |     |     |       |       |      |      |
|---------------------------------|----------------|------------------------|-------|----|-----|-----|-------|-------|------|------|
| <b>chr11:4592406-4593006</b>    | Forward primer | TGCCACAGCACAGTAACACC   | Plus  | 20 | 163 | 182 | 60.82 | 55.00 | 3.00 | 0.00 |
|                                 | Reverse primer | GCCATTGACCAGCAGTAAAGCA | Minus | 22 | 596 | 575 | 61.72 | 50.00 | 3.00 | 0.00 |
|                                 | Product length | 434                    |       |    |     |     |       |       |      |      |
|                                 |                |                        |       |    |     |     |       |       |      |      |
| <b>chr9:79318076-79318690</b>   | Forward primer | TGCTTTTACTGATGGTGTGCCT | Plus  | 22 | 30  | 51  | 60.49 | 45.45 | 2.00 | 0.00 |
|                                 | Reverse primer | TCTCTGAACCTCGGCTTGGGT  | Minus | 20 | 466 | 447 | 60.83 | 55.00 | 3.00 | 0.00 |
|                                 | Product length | 437                    |       |    |     |     |       |       |      |      |
|                                 |                |                        |       |    |     |     |       |       |      |      |
| <b>chr14:20528149-20528767</b>  | Forward primer | CTGGAACCTTTCTGAGTTGAGT | Plus  | 22 | 32  | 53  | 57.92 | 45.45 | 3.00 | 1.00 |
|                                 | Reverse primer | ATCGCAAACCCCTTTAGCAG   | Minus | 20 | 492 | 473 | 58.54 | 50.00 | 3.00 | 1.00 |
|                                 | Product length | 461                    |       |    |     |     |       |       |      |      |
|                                 |                |                        |       |    |     |     |       |       |      |      |
| <b>chr12:9994146-9994748</b>    | Forward primer | TCCCAAGGACCATTATTTGTGT | Plus  | 22 | 88  | 109 | 57.60 | 40.91 | 4.00 | 0.00 |
|                                 | Reverse primer | ACTGCAAAGATGCCATAACCCT | Minus | 22 | 444 | 423 | 60.29 | 45.45 | 5.00 | 0.00 |
|                                 | Product length | 357                    |       |    |     |     |       |       |      |      |
|                                 |                |                        |       |    |     |     |       |       |      |      |
| <b>chr9:100092668-100093268</b> | Forward primer | GACATGACCAGAAGTGAGGAA  | Plus  | 21 | 2   | 22  | 57.31 | 47.62 | 4.00 | 0.00 |
|                                 | Reverse primer | CACTGAAGACCCAGCTTACA   | Minus | 21 | 473 | 453 | 59.65 | 52.38 | 4.00 | 0.00 |
|                                 | Product length | 472                    |       |    |     |     |       |       |      |      |
|                                 |                |                        |       |    |     |     |       |       |      |      |
| <b>chr4:155244102-155244705</b> | Forward primer | TCCTGCCACCCATCTCTCTA   | Plus  | 20 | 110 | 129 | 59.36 | 55.00 | 3.00 | 2.00 |
|                                 | Reverse primer | CCAGGCTGCAGTGAGCTATC   | Minus | 20 | 466 | 447 | 60.53 | 60.00 | 6.00 | 2.00 |
|                                 | Product length | 357                    |       |    |     |     |       |       |      |      |
|                                 |                |                        |       |    |     |     |       |       |      |      |
| <b>chr3:108475693-108476293</b> | Forward primer | TACCATTCTCCTCCACCTCTTC | Plus  | 22 | 7   | 28  | 58.62 | 50.00 | 2.00 | 0.00 |
|                                 | Reverse primer | TACTGATGACGCTGTTCTTCCA | Minus | 22 | 481 | 460 | 59.44 | 45.45 | 3.00 | 0.00 |
|                                 | Product length | 475                    |       |    |     |     |       |       |      |      |
